# Supplementary material for: A recombinant platform to characterize the role of transmembrane protein hTMEM205 in Pt(ii)-drug resistance and extrusion
Source: Royal Society of Chemistry journal article supplement (doi:10.1039/d0mt00114g), 2020-07-15
Supplement: d0mt00114g1.pdf [file d0mt00114g1.pdf]

## *Supporting Information*

# **A recombinant platform to characterize the role of transmembrane protein hTMEM205 in Pt(II)-drug resistance and extrusion**

Marc J. Gallenito<sup>1</sup>, Tahir S. Qasim<sup>1</sup>, Jasmine N. Tutol<sup>1</sup>, Ved Prakash<sup>2</sup>, Sheel C. Dodani<sup>1</sup> & Gabriele Meloni<sup>1</sup>

<sup>1</sup> Department of Chemistry and Biochemistry, The University of Texas at Dallas, Richardson, TX 75080, USA

<sup>2</sup> Imaging and Histology Core and Olympus Discovery Center, Office of Research, The University of Texas at Dallas, Richardson, TX 75080, USA

To whom correspondence should be addressed: [gabriele.meloni@utdallas.edu](mailto:gabriele.meloni@utdallas.edu)

## Supplementary Figures

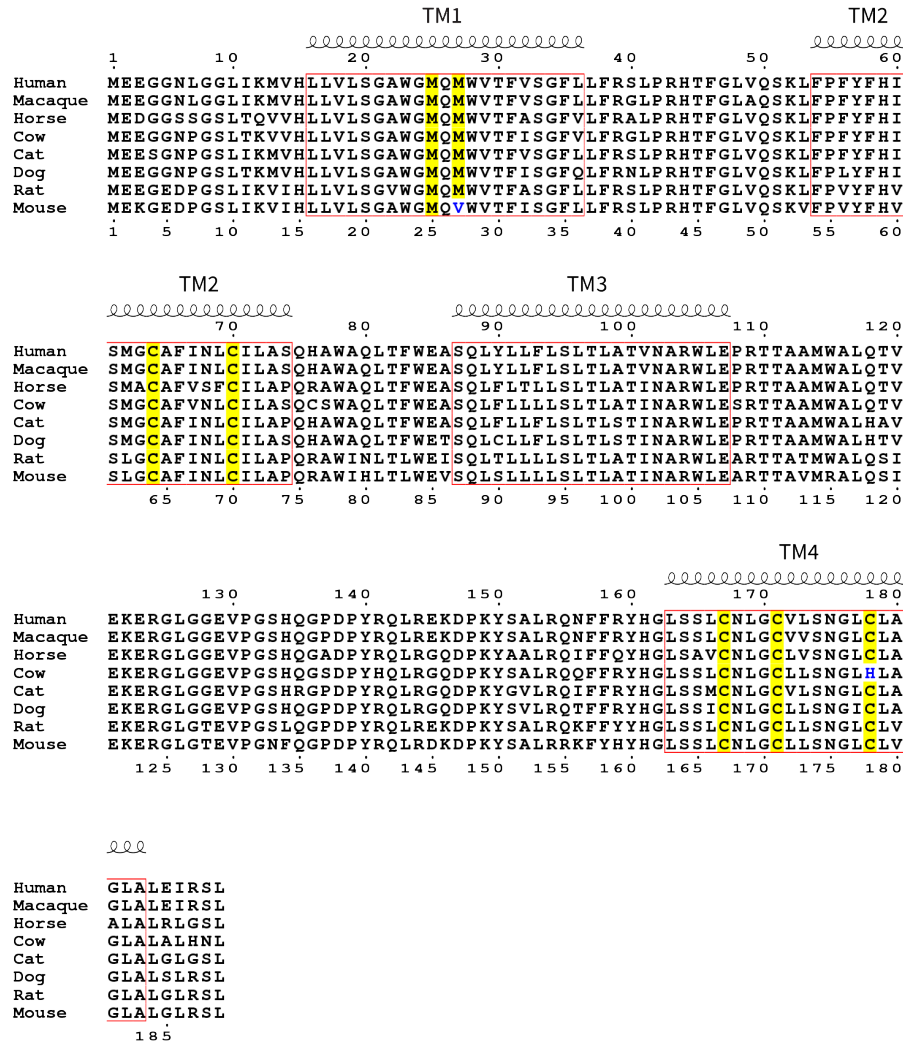

**Supplementary Fig. 1.** Sequence alignment of selected mammalian hTMEM205 orthologues. Uniprot accession numbers: Human (*Homo sapiens*, Q6UW68), Macaque (*Macaca mulatta*, H9YY46), Horse (*Equus caballus*, F7CLB0), Cow (*Bos taurus*, Q32L10), Cat (*Felis catus*, A0A337S1G6), Dog (*Canis Familiaris*, E2RJL2), Rat (*Rattus norvegicus*, D3ZJZ0), Mouse (*Mus musculus*, Q91XE8). Transmembrane cysteine and methionine residues are highlighted in yellow while transmembrane helices obtained by topology predictions with TOPCONS are framed in a red box. The figure was generated using Esript 3.0 (<http://esript.ibcp.fr/ESPrift/ESPrift/>).

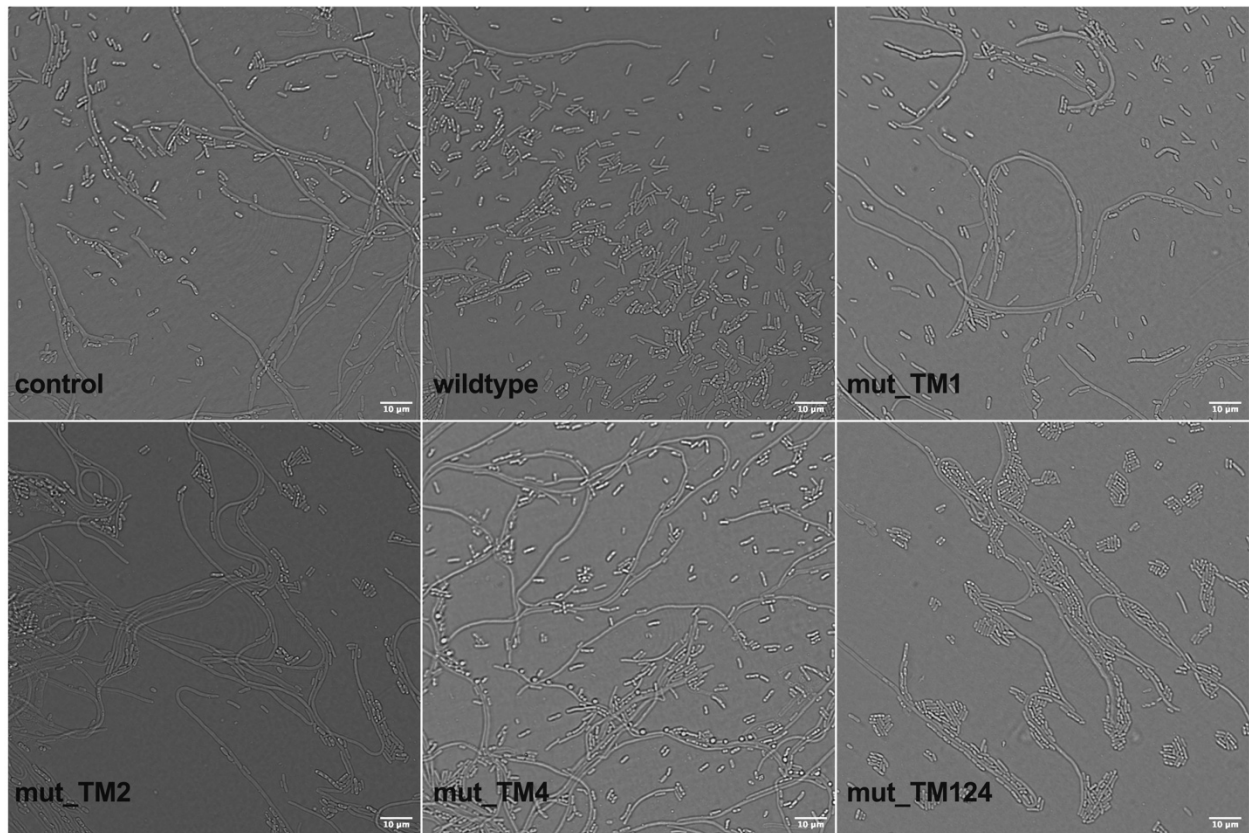

**Supplementary Fig. 2.** Representative raw confocal images of hTMEM205 *E. coli* cells and its mutants, after an 8 h exposure to 15  $\mu$ M cisplatin (scale bar = 10  $\mu$ m). Elongation analysis was performed on at least three biological replicates and at least two different image fields each.

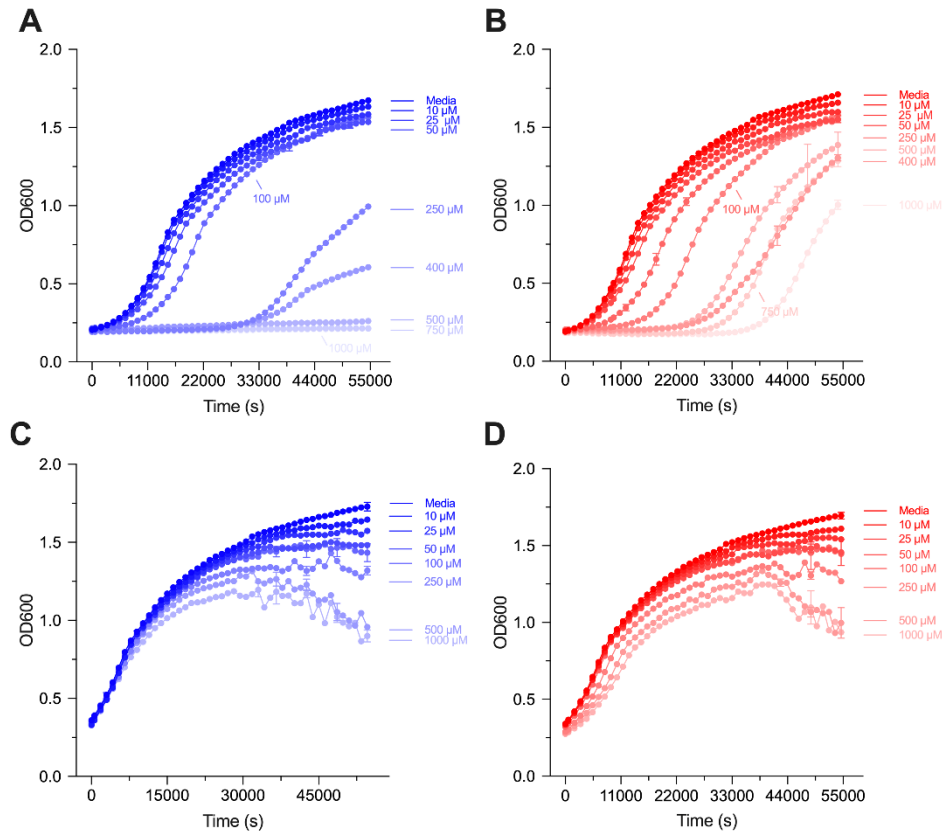

**Supplementary Fig. 3.** Representative growth curves of control (blue) and hTMEM205 (red) *E. coli* cells in a spectrum of concentrations of oxaliplatin (A, B) and carboplatin (C, D). Data are mean  $\pm$  s.d of three technical triplicates of one biological replicate. Three biological replicates were conducted, and analysis is reported in Fig. 3A and 3B.

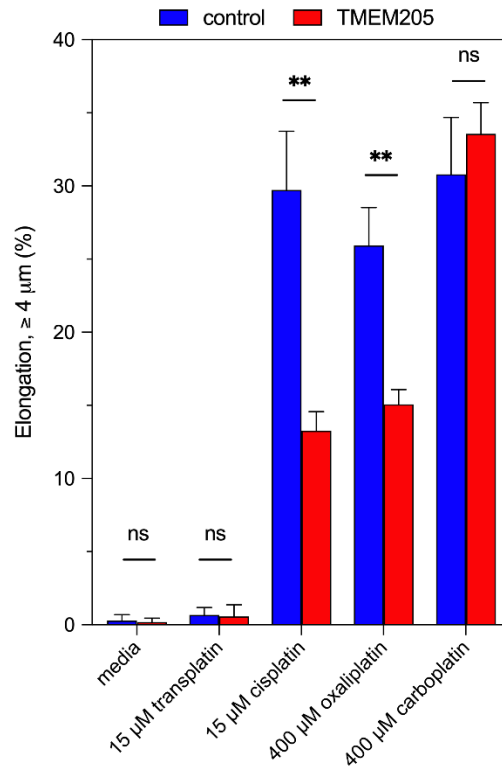

**Supplementary Fig. 4.** Percent elongation of control vs. TMEM205 in different conditions. Four  $\mu\text{m}$  was assigned as the threshold for elongation. Data represents mean and s.d. of at least three biological replicates. Significance is expressed as  $P > 0.05$  (ns) and  $P < 0.01$  (\*\*).

### Supplementary Table

| <b>Mutant Name</b> | <b>Mutation positions</b>                 | <b>TM 1</b> | <b>TM 2</b> | <b>TM 4</b> |
|--------------------|-------------------------------------------|-------------|-------------|-------------|
| <b>Mut_TM1</b>     | M25A_M27A                                 | <b>X</b>    |             |             |
| <b>Mut_TM2</b>     | C64A_C70A                                 |             | <b>X</b>    |             |
| <b>Mut_TM4</b>     | C167A_C171A_C178A                         |             |             | <b>X</b>    |
| <b>Mut_TM124</b>   | M25A_M27A_C64A_C70A_<br>C167A_C171A_C178A | <b>X</b>    | <b>X</b>    | <b>X</b>    |

**Supplementary Table 1:** hTMEM205 mutants in conserved cysteine and methionine transmembrane (TM) residues and corresponding location in TM helices according to the topology model.

## Supplementary Video

**Supplementary Video 1.** Time-lapse of control and hTMEM205 *E. coli* cells growing in 50  $\mu$ M cisplatin at 8 fps. Images were taken every 2 min for 5 h at 30 °C.
